# Supplementary material for: Balanced Excitatory and Inhibitory Synaptic Currents Promote Efficient Coding and Metabolic Efficiency
Source: PLoS Comput Biol. 2013 Oct 3;9(10):e1003263. doi: 10.1371/journal.pcbi.1003263 (PMC3789774; doi:10.1371/journal.pcbi.1003263)
Supplement: Table S1 — Parameters for the stochastic Hodgkin-Huxley model. (DOCX) [file pcbi.1003263.s002.docx]

**Table S1 Parameters for the stochastic Hodgkin-Huxley model**

| SYMBOL | DEFINITION | VALUE, UNITS |
| --- | --- | --- |
| Cm | Specific membrane capacitance |  |
| T | Temperature |  |
| EL | Leakage reversal potential |  |
| ENa | Sodium reversal potential |  |
| EK | Potassium reversal potential |  |
| gLeak | Leakage conductance |  |
| NNa | Na+ channel density |  |
| NK | K+ channel density |  |
|  | Opening rate (activation, Na+) |  |
|  | Opening rate (inactivation, Na+) |  |
|  | Opening rate (activation, K+) |  |
|  | Closing rate (activation, Na+) |  |
|  | Closing rate (inactivation, Na+) |  |
|  | Closing rate (activation, K+) |  |
